# Supplementary material for: An Overview of the Phytochemical Composition of Different Organs of Prunus spinosa L., Their Health Benefits and Application in Food Industry
Source: MDPI journal article supplement (doi:10.3390/horticulturae10010029), 2023-12-28
Supplement: s1 [file s1]

Table S1. The fatty acids from *P. spinosa* L. fruits

| FATTY ACIDS |                                     | References                       |                                  |                               |
|-------------|-------------------------------------|----------------------------------|----------------------------------|-------------------------------|
|             |                                     | Babalau-Fuss et al,<br>2021 [41] | Özcan*and<br>Bayçu, 2008<br>[58] | Barros et al,<br>2010<br>[52] |
|             |                                     | Concentration %                  |                                  |                               |
|             | <b>Total FATTY ACIDS of which:</b>  | <b>28.60</b>                     | <b>0.22</b>                      | <b>1.98</b>                   |
| <b>SFA</b>  | of which:                           | 18.80                            | 56.56                            | 15.16                         |
|             | Caprylic (C8:0)                     | nd                               | nd                               | 0.01                          |
|             | Capric (C10:0)                      | nd                               | nd                               | 0.02                          |
|             | Lauric (C12:0)                      | nd                               | 1.10                             | 0.10                          |
|             | Miristic (C14:0)                    | nd                               | 1.61                             | 0.09                          |
|             | Pentadecanoic (C15:0)               | nd                               | nd                               | 0.03                          |
|             | Palmitic (C16:0)                    | 4.80                             | 34.0                             | 6.50                          |
|             | Margaric (C17:0)                    | 5.10                             | nd                               | 0.11                          |
|             | Stearic (C18:0)                     | 0.05                             | 16.20                            | 2.51                          |
|             | Arahdic (C20:0)                     | nd                               | 1.17                             | 0.56                          |
|             | Behenic (C22:0)                     | nd                               | nd                               | 0.32                          |
|             | Tricosilic (C23:0)                  | nd                               | nd                               | 4.42                          |
| <b>MUFA</b> | Oleic - ω9 (C18:1)                  | 46.20                            | 22.73                            | 57.58                         |
|             | Eicosenoic (C20:1)                  | nd                               | nd                               | 0.06                          |
|             | Heptadecenoic (C17:1)               | nd                               | nd                               | 0.10                          |
|             | Palmitoleic (C16:1)                 | nd                               | nd                               | 0.67                          |
| <b>PUFA</b> | of which:                           | 34.54                            | 12.95                            | 26.40                         |
|             | Linoleic ω6 (C18:2, n-6)            | 32.60                            | 6.07                             | 23.57                         |
|             | Eicosatrioneic ω6 (C20:3, n-6))     | nd                               | 3.17                             | nd                            |
|             | Gamma-linolenic ω6 (C18:2, n-6)     | nd                               | 1.76                             | nd                            |
|             | Eicosatrienoic ω3 (C20:3, n-3)      | nd                               | nd                               | 0.03                          |
|             | Alfa-linolenic ALA ω3 (C18:3, n-3), | 0.86                             | 1.95                             | 2.79                          |
|             | <b>ΣSFA</b>                         | <b>18.86</b>                     | <b>56.56</b>                     | <b>15.16</b>                  |
|             | <b>ΣMUFA</b>                        | <b>46.20</b>                     | <b>20.85</b>                     | <b>58.45</b>                  |
|             | <b>ΣPUFA</b>                        | <b>34.54</b>                     | <b>12.95</b>                     | <b>26.40</b>                  |
|             | <b>PUFAs/SFAs ratio</b>             | <b>1.83</b>                      | <b>0.23</b>                      | <b>1.74</b>                   |

nd-not determined; SFA - Saturated fatty acids; MUFA - monounsaturated fatty acid, PUFA - polyunsaturated fatty acids.
